# Supplementary material for: WE CARE 4 KIDS: Use of a Rounding Tool in the Pediatric Intensive Care Unit
Source: PubMed Central journal article supplement (PMC6132891; doi:10.1097/pq9.0000000000000044), 2017-11-17
Supplement: pqs-2-e044-s001.pdf [file pqs-2-e044-s001.pdf]

# WE CARE 4 KIDS

Date: \_\_\_\_\_ I'm in room: \_\_\_\_\_ **WE** started rounds at: \_\_\_\_\_ **WE** ended rounds at: \_\_\_\_\_

| Who's here to talk about me? (Please circle) |            |        |                 |              |                   |
|----------------------------------------------|------------|--------|-----------------|--------------|-------------------|
| PICU Resident                                | Bedside RN | PharmD | RD              | CV APN       | Cards APN         |
| PICU Attending                               | Charge RN  | RT     | Cards Attending | Cards Fellow | CV Surg Attending |

**Weight:** NA Will weigh today  
*(If you are concerned that I'm not growing or if my medications need to be adjusted, please discuss weight)*  
**Extubation Plan:** NA Discussed: \_\_\_\_\_  
*(If I am healthy enough and don't require help from the vent, please discuss my extubation plan)*

**Care conference/Child Life/Dispo/DC planning:** Family Support  
 The date of my last family care conference: \_\_\_\_\_ Dispo D/C in < 7 days - planning  
*(If I have been here for more than 7 days) (If I am ready to move to another unit/ home)*

**Activities/Therapies:** NA Discussed: \_\_\_\_\_  
*(If you think I'm ready to start moving/eating and I'm not receiving tx's, please discuss if I need PT/OT/speech)*

**Radiographs/Labs:** NA Lab schedule: \_\_\_\_\_  
 NA Imaging schedule: \_\_\_\_\_

**Electrolytes:** NA Discussed: \_\_\_\_\_  
*(Including IV electrolyte riders, electrolytes in TPN, oral electrolyte supplementation)*

**Kind encouragement for parents to participate:**  Not present, will update by: \_\_\_\_\_  
 Present

**Indwelling catheters/infection prevention:** NA Will remove: \_\_\_\_\_  
 No indwelling catheters will be removed and infection prevention has been discussed  
 *(I still require frequent labs draws, CVL access, or strict monitoring of my UOP)*  
 *(VAP prevention, integrity of dressing sites)*

**Drug reconciliation:** Discussed Drug Levels: \_\_\_\_\_ Antibiotics: \_\_\_\_\_

**Sedation/analgesia/paralytics:** NA Discussed: \_\_\_\_\_  
 Pain score goal \_\_\_\_\_ Sedation score goal \_\_\_\_\_

Look at Dr. \_\_\_\_\_'s daily progress note for my detailed plan of the day.  
 (Resident)

**Clinical care plans were created and discussed in multi-disciplinary rounds** \_\_\_\_\_  
 (PICU Attending)

**NURSING TIME OUT:**

The team completed **WE CARE 4 KIDS** -  
 Does anyone have any further questions or concerns?

I understand the **4 goals** of the day to be:

- 1)
- 2)
- 3)
- 4)

**THIS IS NOT A PART OF MY MEDICAL RECORD, PLEASE PLACE IN THE "WE CARE 4 KIDS" FOLDER LOCATED IN MY ROOM**
